# Supplementary material
Source: PubMed Central journal article supplement (PMC6318120)
Supplement: NIHMS998616-supplement-supplemental_figures.pdf [file NIHMS998616-supplement-supplemental_figures.pdf]

**Supplementary Figure 1.**

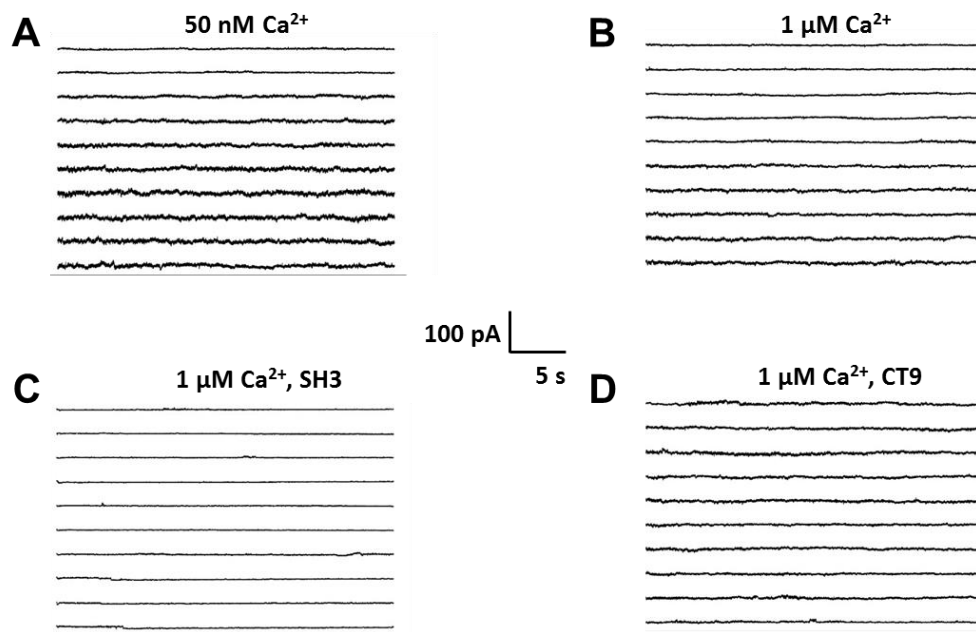

**Supplemental Figure 1.** Panels A to D display example traces depicting unitary currents obtained at  $V_m$  of +60 mV (30 s) in native HeLa cells, which do not endogenously express Cx43. Traces obtained at 50 nM  $[Ca^{2+}]_i$  and 1  $\mu M$   $[Ca^{2+}]_i$  in the absence of peptides are shown in A and B, respectively. Peptides (100  $\mu M$ ) corresponding to the SH3-binding domain (C) and the CT9 region (D) were added at the conditions containing 1  $\mu M$   $[Ca^{2+}]_i$ . In contrast to Cx43-expressing HeLa cells, neither SH3-binding domain nor CT9 did trigger hemichannel-like currents.

Supplementary Figure 2.

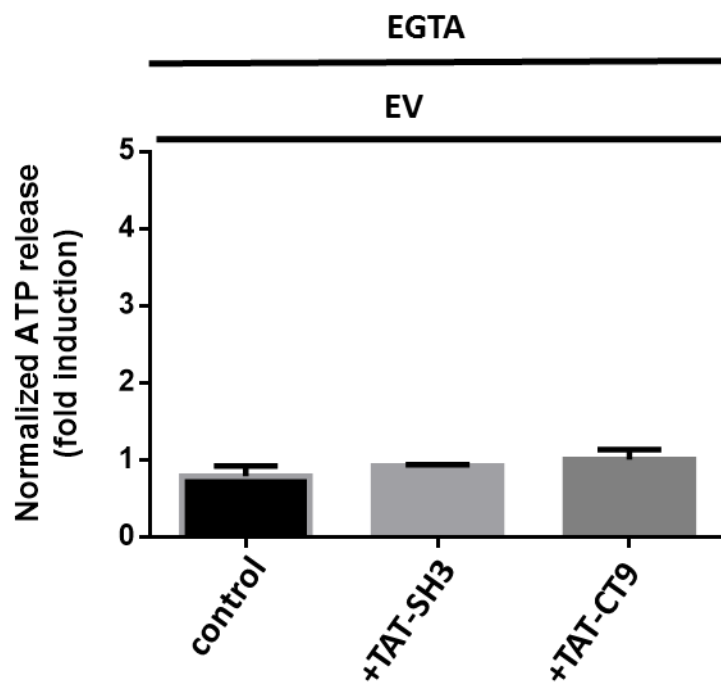

**Supplemental Figure 2.** Data show normalized ATP release as fold induction of baseline values from empty vector (EV)-transfected HeLa cells challenged with EGTA (5 mM) in the presence of vehicle (control), TAT-SH3 (100  $\mu$ M) or TAT-CT9 (100  $\mu$ M). These experiments were performed together with the experiments presented in Figure 6D. Thus, EV control values are the same as the ones presented in Figure 6D. The data were obtained from 3 independent experiments.
